# Supplementary material
Source: PubMed Central journal article supplement (PMC1896261)
Supplement: biophysj_106.098517_1.pdf [file biophysj_106.098517_1.pdf]

## SUPPLEMENTARY TABLES

Table S1. Hill Coefficients for Symmetrical KCl Spermine Inhibition Dose – Response Curves.

| <b>Hill Coefficient Values</b> |                       |                      |                      |                      |
|--------------------------------|-----------------------|----------------------|----------------------|----------------------|
| <b>V<sub>j</sub> (mV)</b>      | <b>100% sym [KCl]</b> | <b>75% sym [KCl]</b> | <b>50% sym [KCl]</b> | <b>25% sym [KCl]</b> |
| 9.0 ± 0.1                      | 0.96 ± 0.74           | 0.40 ± 0.03          | 0.53 ± 0.05          | 0.54 ± 0.04          |
| 13.8 ± 0.1                     | 0.73 ± 0.28           | 0.42 ± 0.04          | 0.49 ± 0.03          | 0.48 ± 0.04          |
| 18.6 ± 0.1                     | 0.57 ± 0.15           | 0.45 ± 0.02          | 0.49 ± 0.03          | 0.52 ± 0.04          |
| 23.5 ± 0.1                     | 0.67 ± 0.10           | 0.45 ± 0.03          | 0.52 ± 0.05          | 0.55 ± 0.04          |
| 28.4 ± 0.2                     | 0.59 ± 0.09           | 0.59 ± 0.05          | 0.64 ± 0.06          | 0.61 ± 0.04          |
| 33.4 ± 0.2                     | 0.56 ± 0.15           | 0.68 ± 0.06          | 0.64 ± 0.05          | 0.72 ± 0.04          |
| 38.4 ± 0.2                     | 0.61 ± 0.11           | 0.71 ± 0.06          | 0.65 ± 0.06          | 0.73 ± 0.05          |
| 43.5 ± 0.2                     | 0.59 ± 0.10           | 0.81 ± 0.06          | 0.69 ± 0.05          | 0.78 ± 0.05          |
| 48.4 ± 0.2                     | 0.45 ± 0.14           | 0.78 ± 0.06          | 0.68 ± 0.07          | 0.72 ± 0.06          |
| Mean ± S.D.*                   | 0.58 ± 0.03           | 0.64 ± 0.14          | 0.62 ± 0.08          | 0.66 ± 0.10          |

\* Average of Hill Coefficients for given KCl condition excluding the three lowest V<sub>j</sub> values.

Table S2. Hill Coefficients for Cx40 Gap Junction-Spermine Inhibition Dose –Response Curves.

| <b>Hill Coefficients for Effective <math>K_d</math> Values</b> |                                   |                                   |                                   |                                 |                                 |                                 |                                 |
|----------------------------------------------------------------|-----------------------------------|-----------------------------------|-----------------------------------|---------------------------------|---------------------------------|---------------------------------|---------------------------------|
| <b><math>V_j</math><br/>(mV)</b>                               | <b>25% <i>trans</i><br/>[KCl]</b> | <b>50% <i>trans</i><br/>[KCl]</b> | <b>75% <i>trans</i><br/>[KCl]</b> | <b>100%-<br/>100%<br/>[KCl]</b> | <b>75% <i>cis</i><br/>[KCl]</b> | <b>50% <i>cis</i><br/>[KCl]</b> | <b>25% <i>cis</i><br/>[KCl]</b> |
| <b>4.3<br/>± 1.1</b>                                           | ---                               | ---                               | ---                               | ---                             | ---                             | 0.7 (fixed)                     | 2.35 ± 0.75                     |
| <b>8.9<br/>± 1.0</b>                                           | 1.29 ± 0.48                       | 1.19 ± 1.04                       | 0.6 (fixed)                       | 0.96 ± 0.74                     | 1.17 ± 0.49                     | 0.7 (fixed)                     | 1.78 ± 0.16                     |
| <b>13.6<br/>± 0.9</b>                                          | 0.91 ± 0.08                       | 0.90 ± 0.29                       | 0.6 (fixed)                       | 0.73 ± 0.28                     | 0.76 ± 0.12                     | 0.7 (fixed)                     | 1.24 ± 0.13                     |
| <b>18.3<br/>± 0.8</b>                                          | 0.68 ± 0.10                       | 0.72 ± 0.14                       | 0.49 ± 0.14                       | 0.57 ± 0.15                     | 0.59 ± 0.08                     | 0.7 (fixed)                     | 0.96 ± 0.20                     |
| <b>23.1<br/>± 0.7</b>                                          | 0.54 ± 0.12                       | 0.69 ± 0.10                       | 0.50 ± 0.10                       | 0.67 ± 0.10                     | 0.68 ± 0.07                     | 0.52 ± 0.11                     | 1.03 ± 0.19                     |
| <b>28.1<br/>± 0.7</b>                                          | 0.47 ± 0.12                       | 0.58 ± 0.11                       | 0.52 ± 0.08                       | 0.59 ± 0.09                     | 0.68 ± 0.14                     | 0.64 ± 0.18                     | 1.03 ± 0.21                     |
| <b>33.1<br/>± 0.6</b>                                          | 0.55 ± 0.10                       | 0.41 ± 0.14                       | 0.65 ± 0.08                       | 0.56 ± 0.15                     | 0.57 ± 0.12                     | 0.76 ± 0.18                     | 1.10 ± 0.23                     |
| <b>38.1<br/>± 0.5</b>                                          | 0.71 ± 0.09                       | 0.43 ± 0.07                       | 0.65 ± 0.09                       | 0.61 ± 0.11                     | 0.60 ± 0.13                     | 0.64 ± 0.15                     | 1.09 ± 0.34                     |
| <b>43.2<br/>± 0.5</b>                                          | 0.92 ± 0.19                       | 0.35 ± 0.07                       | 0.71 ± 0.13                       | 0.59 ± 0.10                     | 0.50 ± 0.10                     | 0.81 ± 0.17                     | 1.25 ± 0.38                     |
| <b>48.2<br/>± 0.5</b>                                          | 0.60 ± 0.10                       | 0.33 ± 0.03                       | 0.61 ± 0.04                       | 0.45 ± 0.14                     | 0.38 ± 0.10                     | 0.85 ± 0.16                     | 1.19 ± 0.58                     |
| <b>Mean*<br/>± S.D.</b>                                        | 0.64 ± 0.03                       | 0.50 ± 0.04                       | 0.58 ± 0.03                       | 0.58 ± 0.03                     | 0.57 ± 0.03                     | 0.70 ± 0.03                     | 1.09 ± 0.14                     |

\*Average of Hill Coefficients for given KCl condition excluding the three lowest and all fixed  $V_j$  values.

Table S3. Symmetrical [KCl] On-rate and Off-rate Parameters for Cx40 Spermine Block.

|              | <b>On-Rates*</b>                                         |                                  |                                                         |          | <b>Off-Rates†</b>                       |                                   |                                        |          |
|--------------|----------------------------------------------------------|----------------------------------|---------------------------------------------------------|----------|-----------------------------------------|-----------------------------------|----------------------------------------|----------|
| <b>% KCl</b> | <b>Amplitude</b><br>(ms <sup>-1</sup> mM <sup>-1</sup> ) | <b>V<sub>k, on</sub></b><br>(mV) | <b>Constant</b><br>(ms <sup>-1</sup> mM <sup>-1</sup> ) | <b>r</b> | <b>Amplitude</b><br>(ms <sup>-1</sup> ) | <b>V<sub>k, off</sub></b><br>(mV) | <b>Constant</b><br>(ms <sup>-1</sup> ) | <b>r</b> |
| <b>25%</b>   | 0.00033<br>± 0.000149                                    | 11.53<br>± 1.63                  | 0.000316<br>± 0.000317                                  | 0.78     | 0.1077<br>± 0.0022                      | -17.17<br>± 0.73                  | 0.000841<br>± 0.000993                 | 0.83     |
| <b>50%</b>   | 0.000199<br>± 0.000078                                   | 12.36<br>± 1.42                  | 0.000113<br>± 0.000198                                  | 0.82     | 0.1599<br>± 0.0031                      | -15.96<br>± 0.64                  | 0.001331<br>± 0.001346                 | 0.84     |
| <b>75%</b>   | 0.00032<br>± 0.000202                                    | 13.27<br>± 2.96                  | 0.0000252<br>± 0.000359                                 | 0.71     | 0.1837<br>± 0.0036                      | -14.38<br>± 0.58                  | 0.001905<br>± 0.001516                 | 0.84     |
| <b>100%</b>  | 0.000169<br>± 0.000081                                   | 13.51<br>± 2.08                  | -0.000099<br>± 0.000175                                 | 0.77     | 0.1928<br>± 0.0042                      | -13.55<br>± 0.59                  | 0.000104<br>± 0.001686                 | 0.81     |

\* V<sub>init</sub> value was the minimum V<sub>j</sub> value from Table 2.

† V<sub>init</sub> value was the maximum V<sub>j</sub> value from Table 2.

Table S4. On-rate and Off-rate Parameters for Spermine Block Cx40 Gap Junctions.

| % KCl<br>( <i>cis or trans</i> ) | On-Rates*                                         |                            |                                                  |      | Off-Rates†                       |                             |                                 |      |
|----------------------------------|---------------------------------------------------|----------------------------|--------------------------------------------------|------|----------------------------------|-----------------------------|---------------------------------|------|
|                                  | Amplitude<br>(ms <sup>-1</sup> mM <sup>-1</sup> ) | V <sub>k, on</sub><br>(mV) | Constant<br>(ms <sup>-1</sup> mM <sup>-1</sup> ) | r    | Amplitude<br>(ms <sup>-1</sup> ) | V <sub>k, off</sub><br>(mV) | Constant<br>(ms <sup>-1</sup> ) | r    |
| <b>25%</b><br><i>trans</i>       | 0.000126<br>± 0.000138                            | 9.87<br>± 2.55             | 0.000203<br>± 0.000626                           | 0.59 | 0.0901<br>± 0.0027               | -17.62<br>± 1.16            | 0.000053<br>± 0.00133           | 0.77 |
| <b>50%</b><br><i>trans</i>       | 0.000129<br>± 0.000141                            | 10.13<br>± 2.72            | 0.000232<br>± 0.000562                           | 0.61 | 0.1431<br>± 0.0034               | -17.01<br>± 0.89            | 0.000054<br>± 0.00158           | 0.82 |
| <b>75%</b><br><i>trans</i>       | 0.000211<br>± 0.000184                            | 12.22<br>± 3.07            | -0.000024<br>± 0.000487                          | 0.63 | 0.1559<br>± 0.0021               | -15.55<br>± 1.43            | 0.000123<br>± 0.000924          | 0.89 |
| <b>100%-<br/>100%</b>            | 0.000169<br>± 0.000081                            | 13.51<br>± 2.08            | -0.000099<br>± 0.000175                          | 0.77 | 0.1928<br>± 0.0042               | -13.55<br>± 0.59            | 0.000104<br>± 0.001686          | 0.81 |
| <b>75% cis</b>                   | 0.000115<br>± 0.000101                            | 16.60<br>± 5.33            | -0.000106<br>± 0.000185                          | 0.70 | 0.1923<br>± 0.0045               | -11.22<br>± 0.53            | 0.00455<br>± 0.00175            | 0.82 |
| <b>50% cis</b>                   | 0.000087<br>± 0.000074                            | 20.46<br>± 8.20            | -0.000084<br>± 0.000097                          | 0.74 | 0.2250<br>± 0.0041               | -10.07<br>± 0.37            | 0.00426<br>± 0.00154            | 0.88 |
| <b>25% cis</b>                   | 0.000051<br>± 0.000062                            | 21.09<br>± 14.89           | -0.000034<br>± 0.000070                          | 0.78 | 0.2404<br>± 0.0080               | -9.43<br>± 0.67             | 0.00721<br>± 0.00344            | 0.82 |

\* V<sub>init</sub> value was the minimum V<sub>j</sub> value from Table 3.

† V<sub>init</sub> value was the maximum V<sub>j</sub> value from Table 3.

Table S5. Effective Electrical Distance Values for Spermine Inhibition.\*

| % KCl ( <i>cis</i> or <i>trans</i> ) | $b_{-1}/b_1$ | S.E. | $z\delta$ | S.E. | $\delta^\dagger$ | C     | S.E.  | r    |
|--------------------------------------|--------------|------|-----------|------|------------------|-------|-------|------|
| <b>100%-100%</b>                     | 115.5        | 4.8  | 4.23      | 0.18 | 1.06             | 0.09  | 0.06  | 0.97 |
| <b>75% symmetrical</b>               | 91.1         | 14.5 | 4.38      | 0.22 | 1.09             | 0.14  | 0.05  | 0.97 |
| <b>50% symmetrical</b>               | 53.1         | 1.42 | 4.49      | 0.04 | 1.12             | 0.13  | 0.004 | 0.99 |
| <b>25% symmetrical</b>               | 59.9         | 5.4  | 4.83      | 0.12 | 1.21             | 0.12  | 0.01  | 0.99 |
| <b>25% <i>trans</i></b>              | 73.1         | 9.8  | 5.61      | 0.20 | 1.40             | 0.06  | 0.01  | 0.98 |
| <b>50% <i>trans</i></b>              | 86.3         | 6.5  | 5.30      | 0.11 | 1.33             | -0.01 | 0.01  | 0.99 |
| <b>75% <i>trans</i></b>              | 72.9         | 3.8  | 4.56      | 0.07 | 1.14             | 0.12  | 0.01  | 0.99 |
| <b>75% <i>cis</i></b>                | 145.8        | 10.3 | 4.00      | 0.10 | 1.00             | -0.03 | 0.06  | 0.98 |
| <b>50% <i>cis</i></b>                | 74.6         | 11.8 | 3.07      | 0.24 | 0.77             | -0.02 | 0.22  | 0.96 |
| <b>25% <i>cis</i></b>                | 42.8         | 4.4  | 2.42      | 0.15 | 0.61             | 0.49  | 0.16  | 0.98 |

\*Woodhull model curve fits were performed on  $K_d^{eff}$  values from  $V_j = 18$  to 43 mV in Tables 2 and 3.

†Spermine has a valence ( $z$ ) of +4.0 at pH 7.4.

**Figure S6.** Unitary Cx40 gap junction channel current – voltage relationships. The filled squares (■) are the measured unitary current amplitudes ( $i_j$ ) obtained during the 30 sec  $V_j$  pulses to the indicated command potentials. All data were acquired using the standard polyamine block protocol under the various *cis-trans* [KCl] conditions. **(A)** The  $i_j - V_j$  relationship for the Cx40 gap junction channel under control [KCl] conditions. The slope of the linear regression fit of the data obtained from the experiment shown in Figure 4A was 148 pS. **(B)** The Cx40 gap junction channel  $i_j - V_j$  relationship after a 25% reduction in the *trans* [KCl] as shown in Figure 4B. Estimation of the apparent  $\gamma_j$  from the  $i_j$  fluctuations did not account for the -6.2 mV shift in the equilibrium electrodiffusion potential ( $E_{rev}$ ). The slope  $\gamma_j$  was 128 pS under these conditions. These results are consistent with previous findings (19). **(C)** The Cx40 gap junction channel  $i_j - V_j$  relationship after a 75% reduction in the *trans* [KCl] as shown in Figure 4F. The gap junctional  $E_{rev}$  is now -26.5 mV, resulting in significantly under- and over-estimated apparent  $\gamma_j$  values for the observed *trans* and *cis*  $i_j$  fluctuations. The linear slope  $\gamma_j$  was reduced to 108 pS under these conditions. Under symmetrical salt conditions, the Cx40 linear slope  $\gamma_j$  was reduced to 120 pS in 75% [KCl] and 70 pS in 25% [KCl] internal pipette solutions (data not shown).

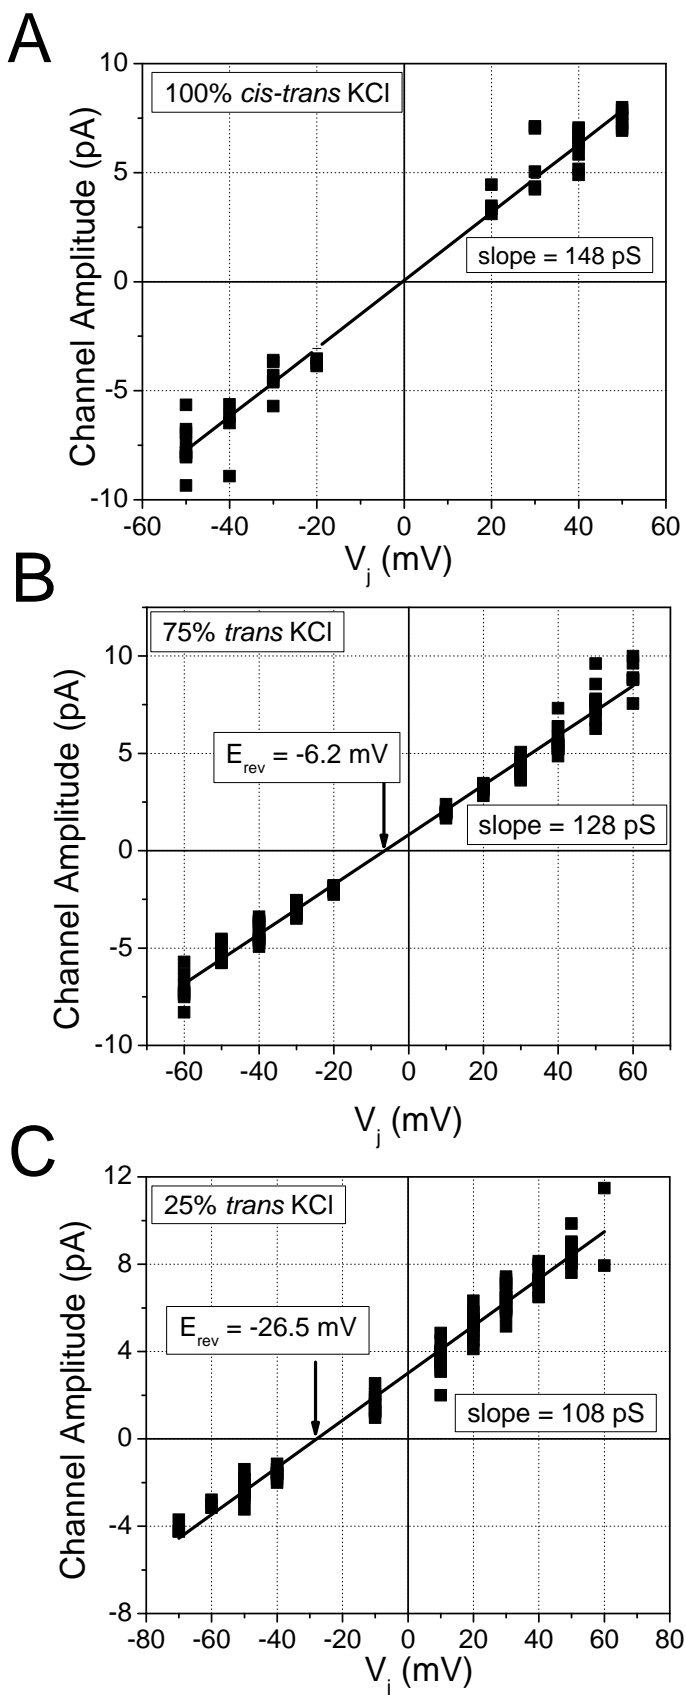

Figure S6  
Lin and Veenstra  
KCl Alteration of Cx40 Spermine Block
